# Supplementary material for: Practical Approach to Designing and Implementing a Recommendation System for Healthy Challenges
Source: MDPI journal article supplement (doi:10.3390/app13179782), 2023-08-29
Supplement: s1 [file s1]

All the challenges presented in this annex are based on recognized and reputable guidelines. Among these are the guidelines related to physical activity and nutrition from the World Health Organization (WHO) [13,14,16,18,19,22,23], the Physical Activity Guidelines for Americans (PAG) [15], the dietary guidelines from the Food and Agricultural Organization (FAO) [20], and the sleep recommendations from the National Sleep Foundation (NSF) [24,25]. In addition to these reputable sources, other studies were used to support the activities included within each challenge, such as the following [52–54].

Based on WHO <sup>1</sup>, PAG <sup>2</sup>, FAO <sup>3</sup>, and NSF <sup>4</sup>.

Challenge 1:

| Item                 | Description                             |
|----------------------|-----------------------------------------|
| Challenge name       | Walk 5,000 steps daily <sup>1,2</sup> . |
| Activity description | Consists of walking 5,000 steps daily   |
| Age group            | -                                       |
| Gender               | -                                       |
| BMI                  | -                                       |
| Special groups       | -                                       |
| Injuries             | Lower body.                             |
| Daily time available | >30'                                    |
| Development location | Any                                     |
| Required materials   | No specific materials                   |
| PF                   | 6                                       |
| BP                   | 5                                       |
| GH                   | 6                                       |
| V                    | 6                                       |
| SF                   | 3.5                                     |
| MH                   | 6                                       |
| FC                   | 1.5                                     |
| LVC                  | 1.5                                     |
| GVC                  | 1.5                                     |
| ASC                  | 1.5                                     |
| WGC                  | 1.5                                     |
| DC                   | 1.5                                     |
| SSS                  | 6.5                                     |
| IS                   | 4                                       |
| HS                   | 2.5                                     |
| ER                   | 3                                       |

Challenge 2:

| Item | Description |
|------|-------------|
|------|-------------|

|                      |                                         |
|----------------------|-----------------------------------------|
| Challenge name       | Walk 10,000 steps daily <sup>1,2.</sup> |
| Activity description | Consists of walking 10,000 steps daily  |
| Age group            | -                                       |
| Gender               | -                                       |
| BMI                  | -                                       |
| Special groups       | None                                    |
| Injuries             | Lower body.                             |
| Daily time available | >30'                                    |
| Development location | Any                                     |
| Required materials   | No specific materials                   |
| PF                   | 7                                       |
| BP                   | 6                                       |
| GH                   | 7                                       |
| V                    | 6.5                                     |
| SF                   | 3.5                                     |
| MH                   | 7                                       |
| FC                   | 2                                       |
| LVC                  | 2                                       |
| GVC                  | 2                                       |
| ASC                  | 2                                       |
| WGC                  | 2                                       |
| DC                   | 2                                       |
| SSS                  | 7                                       |
| IS                   | 5.5                                     |
| HS                   | 3                                       |
| ER                   | 7                                       |

Challenge 3:

| Item                 | Description                              |
|----------------------|------------------------------------------|
| Challenge name       | Walk 30 minutes daily <sup>1,2.</sup>    |
| Activity description | It consists of walking 30 minutes daily. |

|                      |                               |
|----------------------|-------------------------------|
| Age group            | -                             |
| Gender               | -                             |
| BMI                  | -                             |
| Special groups       | None.                         |
| Injuries             | Lower body.                   |
| Daily time available | Between 15 and 30 minutes.    |
| Development location | Any.                          |
| Required materials   | No specific equipment needed. |
| PF                   | 6.5                           |
| BP                   | 5                             |
| GH                   | 6.5                           |
| V                    | 6.5                           |
| SF                   | 4                             |
| MH                   | 6.5                           |
| FC                   | 2                             |
| LVC                  | 2                             |
| GVC                  | 2                             |
| ASC                  | 2                             |
| WGC                  | 2                             |
| DC                   | 2                             |
| SSS                  | 6.5                           |
| IS                   | 5                             |
| HS                   | 3.5                           |
| ER                   | 3                             |

#### Challenge 4:

| Item                 | Description                                                                     |
|----------------------|---------------------------------------------------------------------------------|
| Challenge name       | Jog 30 minutes daily <sup>1,2</sup> .                                           |
| Activity description | It consists of jogging 30 minutes daily.                                        |
| Age group            | -                                                                               |
| Gender               | -                                                                               |
| BMI                  | 30-34.9 = class I obesity. 35-39.9 = class II obesity. >40 = class III obesity. |

|                      |                                                                                 |
|----------------------|---------------------------------------------------------------------------------|
| Special groups       | Musculoskeletal or connective tissue disorders (e.g., arthritis, chondropathy). |
| Injuries             | Lower body.                                                                     |
| Daily time available | Between 15 and 30 minutes.                                                      |
| Development location | Any.                                                                            |
| Required materials   | No specific equipment needed.                                                   |
| PF                   | 8                                                                               |
| BP                   | 6                                                                               |
| GH                   | 8                                                                               |
| V                    | 8                                                                               |
| SF                   | 4                                                                               |
| MH                   | 7.5                                                                             |
| FC                   | 1.5                                                                             |
| LVC                  | 1.5                                                                             |
| GVC                  | 1.5                                                                             |
| ASC                  | 1.5                                                                             |
| WGC                  | 1.5                                                                             |
| DC                   | 1.5                                                                             |
| SSS                  | 4                                                                               |
| IS                   | 3                                                                               |
| HS                   | 1.5                                                                             |
| ER                   | 5                                                                               |

#### Challenge 5:

| Item                 | Description                                                                     |
|----------------------|---------------------------------------------------------------------------------|
| Challenge name       | Run 20 minutes daily <sup>1,2</sup> .                                           |
| Activity description | It consists of intense running for 20 minutes daily.                            |
| Age group            | -                                                                               |
| Gender               | -                                                                               |
| BMI                  | 30-34.9 = class I obesity. 35-39.9 = class II obesity. >40 = class III obesity. |
| Special groups       | Musculoskeletal or connective tissue disorders (e.g., arthritis, chondropathy). |

|                      |                               |
|----------------------|-------------------------------|
| Injuries             | Lower body. Trunk.            |
| Daily time available | Between 15 and 30 minutes.    |
| Development location | Any.                          |
| Required materials   | No specific equipment needed. |
| PF                   | 8.5                           |
| BP                   | 7.5                           |
| GH                   | 8.5                           |
| V                    | 8.5                           |
| SF                   | 4.5                           |
| MH                   | 8                             |
| FC                   | 2                             |
| LVC                  | 2                             |
| GVC                  | 2                             |
| ASC                  | 2                             |
| WGC                  | 2                             |
| DC                   | 2                             |
| SSS                  | 9                             |
| IS                   | 7.5                           |
| HS                   | 4.5                           |
| ER                   | 8                             |

Challenge 6:

| Item                 | Description                                  |
|----------------------|----------------------------------------------|
| Challenge name       | Cycle 30 minutes daily <sup>1,2</sup> .      |
| Activity description | It consists of cycling for 30 minutes daily. |
| Age group            | -                                            |
| Gender               | -                                            |
| BMI                  | -                                            |
| Special groups       | None.                                        |
| Injuries             | Lower body. Upper body. Trunk.               |
| Daily time available | Between 15 and 30 minutes.                   |

|                      |          |
|----------------------|----------|
| Development location | Any.     |
| Required materials   | Bicycle. |
| PF                   | 7.5      |
| BP                   | 6        |
| GH                   | 7.5      |
| V                    | 7        |
| SF                   | 3.5      |
| MH                   | 7        |
| FC                   | 1.5      |
| LVC                  | 1.5      |
| GVC                  | 1.5      |
| ASC                  | 1.5      |
| WGC                  | 1.5      |
| DC                   | 2        |
| SSS                  | 7.5      |
| IS                   | 6        |
| HS                   | 4        |
| ER                   | 3        |

#### Challenge 7:

|                      |                                                                                 |
|----------------------|---------------------------------------------------------------------------------|
| Item                 | Description                                                                     |
| Challenge name       | Pedal 20 minutes daily <sup>1,2</sup>                                           |
| Activity description | It consists of intense cycling for 20 minutes daily.                            |
| Age group            | -                                                                               |
| Gender               | -                                                                               |
| BMI                  | 30-34.9 = class I obesity. 35-39.9 = class II obesity. >40 = class III obesity. |
| Special groups       | Musculoskeletal or connective tissue disorders (e.g., arthritis, chondropathy). |
| Injuries             | Lower body. Upper body. Trunk.                                                  |
| Daily time available | Between 15 and 30 minutes.                                                      |
| Development location | Any.                                                                            |
| Required materials   | Bicycle.                                                                        |

|     |     |
|-----|-----|
| PF  | 7.5 |
| BP  | 6.5 |
| GH  | 7.5 |
| V   | 7.5 |
| SF  | 3.5 |
| MH  | 7.5 |
| FC  | 1.5 |
| LVC | 1.5 |
| GVC | 1.5 |
| ASC | 1.5 |
| WGC | 1.5 |
| DC  | 1.5 |
| SSS | 7.5 |
| IS  | 5.5 |
| HS  | 3   |
| ER  | 5   |

Challenge 8:

| Item                 | Description                                                      |
|----------------------|------------------------------------------------------------------|
| Challenge name       | Swim 30 minutes daily <sup>1,2</sup> .                           |
| Activity description | It consists of swimming for 30 minutes daily.                    |
| Age group            | -                                                                |
| Gender               | -                                                                |
| BMI                  | -                                                                |
| Special groups       | Skin diseases. Circulatory system diseases (e.g., hypertension). |
| Injuries             | Lower body. Upper body. Trunk.                                   |
| Daily time available | Between 15 and 30 minutes.                                       |
| Development location | Swimming pool. Sea.                                              |
| Required materials   | Swim cap and swimsuit.                                           |
| PF                   | 9                                                                |
| BP                   | 8                                                                |
| GH                   | 9                                                                |

|     |     |
|-----|-----|
| V   | 9   |
| SF  | 4   |
| MH  | 7.5 |
| FC  | 2   |
| LVC | 1.5 |
| GVC | 1.5 |
| ASC | 2   |
| WGC | 2   |
| DC  | 2   |
| SSS | 9   |
| IS  | 7.5 |
| HS  | 4.5 |
| ER  | 9   |

Challenge 9:

| Item                 | Description                                                            |
|----------------------|------------------------------------------------------------------------|
| Challenge name       | Eat at least five servings of fruits and vegetables <sup>1,3</sup> .   |
| Activity description | It consists of consuming five servings of fruits and vegetables daily. |
| Age group            | -                                                                      |
| Gender               | -                                                                      |
| BMI                  | -                                                                      |
| Special groups       | Endocrine diseases (e.g., diabetes).                                   |
| Injuries             | -                                                                      |
| Daily time available | Any.                                                                   |
| Development location | Any                                                                    |
| Required materials   | No specific equipment needed.                                          |
| PF                   | 2.5                                                                    |
| BP                   | 3.5                                                                    |
| GH                   | 7                                                                      |
| V                    | 5.5                                                                    |
| SF                   | 5.5                                                                    |
| MH                   | 5.5                                                                    |
| FC                   | 10                                                                     |



|     |     |
|-----|-----|
| LVC | 5   |
| GVC | 4.5 |
| ASC | 4.5 |
| WGC | 4.5 |
| DC  | 4   |
| SSS | 4   |
| IS  | 3.5 |
| HS  | 3   |
| ER  | 5   |

Challenge 10:

| Item                 | Description                                                              |
|----------------------|--------------------------------------------------------------------------|
| Challenge name       | Sleep eight hours daily <sup>1,4</sup> .                                 |
| Activity description | It consists of achieving eight hours of sleep daily throughout the week. |
| Age group            | -                                                                        |
| Gender               | -                                                                        |
| BMI                  | -                                                                        |
| Special groups       | Sleep-wake disorders                                                     |
| Injuries             | -                                                                        |
| Daily time available | Any.                                                                     |
| Development location | Any.                                                                     |
| Required materials   | No specific equipment needed.                                            |
| PF                   | 7.5                                                                      |
| BP                   | 7.5                                                                      |
| GH                   | 7.5                                                                      |
| V                    | 8                                                                        |
| SF                   | 5.5                                                                      |
| MH                   | 8                                                                        |
| FC                   | 2.5                                                                      |
| LVC                  | 2.5                                                                      |
| GVC                  | 2.5                                                                      |
| ASC                  | 3                                                                        |

|     |     |
|-----|-----|
| WGC | 2   |
| DC  | 2.5 |
| SSS | 9   |
| IS  | 9   |
| HS  | 8   |
| ER  | 2   |

Challenge 11:

| Item                 | Description                                                       |
|----------------------|-------------------------------------------------------------------|
| Challenge name       | Go out dancing <sup>1,2</sup> .                                   |
| Activity description | It consists of dancing at least three days a week for 45 minutes. |
| Age group            | -                                                                 |
| Gender               | -                                                                 |
| BMI                  | -                                                                 |
| Special groups       | Skin diseases.                                                    |
| Injuries             | -                                                                 |
| Daily time available | Any.                                                              |
| Development location | Any                                                               |
| Required materials   | No specific equipment needed.                                     |
| PF                   | 8,5                                                               |
| BP                   | 8                                                                 |
| GH                   | 8,5                                                               |
| V                    | 9                                                                 |
| SF                   | 9,5                                                               |
| MH                   | 9                                                                 |
| FC                   | 2,5                                                               |
| LVC                  | 2                                                                 |
| GVC                  | 2                                                                 |
| ASC                  | 2,5                                                               |
| WGC                  | 2                                                                 |
| DC                   | 2                                                                 |
| SSS                  | 8,5                                                               |

|    |   |
|----|---|
| IS | 7 |
| HS | 4 |
| ER | 7 |

Challenge 12:

| Item                 | Description                                                                         |
|----------------------|-------------------------------------------------------------------------------------|
| Challenge name       | HIIT 7' workout <sup>1,2</sup> .                                                    |
| Activity description | It consists of performing three sets of the HIIT 7-minute workout four days a week. |
| Age group            | -                                                                                   |
| Gender               | -                                                                                   |
| BMI                  | 30-34.9 = class I obesity. 35-39.9 = class II obesity. >40 = class III obesity.     |
| Special groups       | -                                                                                   |
| Injuries             | -                                                                                   |
| Daily time available | Between 15 and 30 minutes.                                                          |
| Development location | Any.                                                                                |
| Required materials   | No specific equipment needed.                                                       |
| PF                   | 10                                                                                  |
| BP                   | 10                                                                                  |
| GH                   | 10                                                                                  |
| V                    | 10                                                                                  |
| SF                   | 5                                                                                   |
| MH                   | 8.5                                                                                 |
| FC                   | 3                                                                                   |
| LVC                  | 2.5                                                                                 |
| GVC                  | 2.5                                                                                 |
| ASC                  | 3                                                                                   |
| WGC                  | 2.5                                                                                 |
| DC                   | 3                                                                                   |
| SSS                  | 9                                                                                   |
| IS                   | 7.5                                                                                 |
| HS                   | 4.5                                                                                 |
| ER                   | 8                                                                                   |

Challenge 13:

| Item                 | Description                                                                                   |
|----------------------|-----------------------------------------------------------------------------------------------|
| Challenge name       | Sliding Disc Training <sup>1,2</sup> .                                                        |
| Activity description | It consists of performing three sessions of strength and balance training with sliding discs. |
| Age group            | -                                                                                             |
| Gender               | -                                                                                             |
| BMI                  | -                                                                                             |
| Special groups       | Musculoskeletal or connective tissue disorders (e.g., arthritis, chondropathy).               |
| Injuries             | Lower body. Trunk.                                                                            |
| Daily time available | >30'.                                                                                         |
| Development location | Any.                                                                                          |
| Required materials   | Sliding discs or cloths as an alternative.                                                    |
| PF                   | 8.5                                                                                           |
| BP                   | 8.5                                                                                           |
| GH                   | 8.5                                                                                           |
| V                    | 8                                                                                             |
| SF                   | 3.5                                                                                           |
| MH                   | 6.5                                                                                           |
| FC                   | 2                                                                                             |
| LVC                  | 2.5                                                                                           |
| GVC                  | 2                                                                                             |
| ASC                  | 2.5                                                                                           |
| WGC                  | 2                                                                                             |
| DC                   | 2                                                                                             |
| SSS                  | 8                                                                                             |
| IS                   | 6.5                                                                                           |
| HS                   | 3.5                                                                                           |
| ER                   | 8                                                                                             |

Challenge 14:

| Item                 | Description                                                                                                                                                          |
|----------------------|----------------------------------------------------------------------------------------------------------------------------------------------------------------------|
| Challenge name       | Do not consume stimulants before going to sleep <sup>1,4</sup> .                                                                                                     |
| Activity description | Avoid consuming alcoholic beverages or stimulants, and fruits with high vitamin C content (orange, kiwi, etc.) in the hours before going to bed throughout the week. |
| Age group            | -                                                                                                                                                                    |
| Gender               | -                                                                                                                                                                    |
| BMI                  | -                                                                                                                                                                    |
| Special groups       | -                                                                                                                                                                    |
| Injuries             | -                                                                                                                                                                    |
| Daily time available | Any.                                                                                                                                                                 |
| Development location | Any.                                                                                                                                                                 |
| Required materials   | No specific equipment needed.                                                                                                                                        |
| PF                   | 6                                                                                                                                                                    |
| BP                   | 4                                                                                                                                                                    |
| GH                   | 7                                                                                                                                                                    |
| V                    | 6                                                                                                                                                                    |
| SF                   | 2.5                                                                                                                                                                  |
| MH                   | 6.5                                                                                                                                                                  |
| FC                   | 1.5                                                                                                                                                                  |
| LVC                  | 1.5                                                                                                                                                                  |
| GVC                  | 1.5                                                                                                                                                                  |
| ASC                  | 1.5                                                                                                                                                                  |
| WGC                  | 1.5                                                                                                                                                                  |
| DC                   | 1.5                                                                                                                                                                  |
| SSS                  | 9                                                                                                                                                                    |
| IS                   | 9                                                                                                                                                                    |
| HS                   | 7.5                                                                                                                                                                  |
| ER                   | 2                                                                                                                                                                    |

Challenge 15:

| Item                 | Description                                                                                                                   |
|----------------------|-------------------------------------------------------------------------------------------------------------------------------|
| Challenge name       | Avoid exposure to artificial light before going to sleep <sup>4</sup> .                                                       |
| Activity description | This consists of avoiding artificial light and the use of screens at least two hours before going to bed throughout the week. |
| Age group            | -                                                                                                                             |
| Gender               | -                                                                                                                             |
| BMI                  | -                                                                                                                             |
| Special groups       | -                                                                                                                             |
| Injuries             | -                                                                                                                             |
| Daily time available | Any.                                                                                                                          |
| Development location | Any.                                                                                                                          |
| Required materials   | No specific equipment needed.                                                                                                 |
| PF                   | 4.5                                                                                                                           |
| BP                   | 5.5                                                                                                                           |
| GH                   | 7                                                                                                                             |
| V                    | 7.5                                                                                                                           |
| SF                   | 4.5                                                                                                                           |
| MH                   | 7                                                                                                                             |
| FC                   | 1                                                                                                                             |
| LVC                  | 1                                                                                                                             |
| GVC                  | 1                                                                                                                             |
| ASC                  | 1                                                                                                                             |
| WGC                  | 1                                                                                                                             |
| DC                   | 1                                                                                                                             |
| SSS                  | 9                                                                                                                             |
| IS                   | 9.5                                                                                                                           |
| HS                   | 6                                                                                                                             |
| ER                   | 6                                                                                                                             |

Challenge 16:

| Item           | Description                                 |
|----------------|---------------------------------------------|
| Challenge name | Eat well to sleep better <sup>1,3,4</sup> . |

|                      |                                                                                                                                                               |
|----------------------|---------------------------------------------------------------------------------------------------------------------------------------------------------------|
| Activity description | This consists of consuming foods that, due to their composition, facilitate sleep, such as bananas, dairy products, fatty fish, or nuts, throughout the week. |
| Age group            | -                                                                                                                                                             |
| Gender               | -                                                                                                                                                             |
| BMI                  | -                                                                                                                                                             |
| Special groups       | Endocrine disorders (e.g., diabetes). None.                                                                                                                   |
| Injuries             | -                                                                                                                                                             |
| Daily time available | Any.                                                                                                                                                          |
| Development location | Any.                                                                                                                                                          |
| Required materials   | No specific equipment needed.                                                                                                                                 |
| PF                   | 4.5                                                                                                                                                           |
| BP                   | 5                                                                                                                                                             |
| GH                   | 6.5                                                                                                                                                           |
| V                    | 6.5                                                                                                                                                           |
| SF                   | 5                                                                                                                                                             |
| MH                   | 6.5                                                                                                                                                           |
| FC                   | 6                                                                                                                                                             |
| LVC                  | 2.5                                                                                                                                                           |
| GVC                  | 2.5                                                                                                                                                           |
| ASC                  | 2.5                                                                                                                                                           |
| WGC                  | 2.5                                                                                                                                                           |
| DC                   | 6                                                                                                                                                             |
| SSS                  | 8.5                                                                                                                                                           |
| IS                   | 9                                                                                                                                                             |
| HS                   | 6                                                                                                                                                             |
| ER                   | 4                                                                                                                                                             |

#### Challenge 17:

|                      |                                                           |
|----------------------|-----------------------------------------------------------|
| Item                 | Description                                               |
| Challenge name       | Eating fruit <sup>1,3</sup> .                             |
| Activity description | This consists of consuming three pieces of fruit per day. |
| Age group            | -                                                         |
| Gender               | -                                                         |

|                      |                                             |
|----------------------|---------------------------------------------|
| BMI                  | -                                           |
| Special groups       | Endocrine disorders (e.g., diabetes). None. |
| Injuries             | -                                           |
| Daily time available | Any.                                        |
| Development location | Any.                                        |
| Required materials   | No specific equipment needed.               |
| PF                   | 5                                           |
| BP                   | 4.5                                         |
| GH                   | 6.5                                         |
| V                    | 6.5                                         |
| SF                   | 2.5                                         |
| MH                   | 6                                           |
| FC                   | 8.5                                         |
| LVC                  | 3                                           |
| GVC                  | 2.5                                         |
| ASC                  | 3                                           |
| WGC                  | 2.5                                         |
| DC                   | 3                                           |
| SSS                  | 5.5                                         |
| IS                   | 5                                           |
| HS                   | 3                                           |
| ER                   | 4                                           |

Challenge 18:

| Item                 | Description                                                                        |
|----------------------|------------------------------------------------------------------------------------|
| Challenge name       | Eating green <sup>1,3</sup> .                                                      |
| Activity description | This consists of consuming three servings of green vegetables and legumes per day. |
| Age group            | -                                                                                  |
| Gender               | -                                                                                  |
| BMI                  | -                                                                                  |
| Special groups       | Endocrine disorders (e.g., diabetes). None.                                        |
| Injuries             | -                                                                                  |



|                      |                               |
|----------------------|-------------------------------|
| Daily time available | Any.                          |
| Development location | Any.                          |
| Required materials   | No specific equipment needed. |
| PF                   | 5.5                           |
| BP                   | 6                             |
| GH                   | 6.5                           |
| V                    | 6                             |
| SF                   | 2.5                           |
| MH                   | 6                             |
| FC                   | 2.5                           |
| LVC                  | 9                             |
| GVC                  | 7.5                           |
| ASC                  | 2.5                           |
| WGC                  | 2.5                           |
| DC                   | 2.5                           |
| SSS                  | 6                             |
| IS                   | 5.5                           |
| HS                   | 3.5                           |
| ER                   | 5                             |

Challenge 19:

|                      |                                                                      |
|----------------------|----------------------------------------------------------------------|
| Item                 | Description                                                          |
| Challenge name       | Eating is the milk <sup>1,3,4</sup> .                                |
| Activity description | This consists of consuming three servings of dairy products per day. |
| Age group            | -                                                                    |
| Gender               | -                                                                    |
| BMI                  | -                                                                    |
| Special groups       | Endocrine disorders (e.g., lactose intolerance).                     |
| Injuries             | -                                                                    |
| Daily time available | Any.                                                                 |
| Development location | Any.                                                                 |

|                    |                               |
|--------------------|-------------------------------|
| Required materials | No specific equipment needed. |
| PF                 | 4.5                           |
| BP                 | 4.5                           |
| GH                 | 6                             |
| V                  | 5.5                           |
| SF                 | 3.5                           |
| MH                 | 5.5                           |
| FC                 | 2                             |
| LVC                | 2                             |
| GVC                | 2                             |
| ASC                | 4                             |
| WGC                | 4.5                           |
| DC                 | 9.5                           |
| SSS                | 7                             |
| IS                 | 7.5                           |
| HS                 | 3.5                           |
| ER                 | 1                             |

Challenge 20:

|                      |                                                                                                                            |
|----------------------|----------------------------------------------------------------------------------------------------------------------------|
| Item                 | Description                                                                                                                |
| Challenge name       | Forget about sugar <sup>1,3</sup> .                                                                                        |
| Activity description | This consists of avoiding consuming more than one sugary beverage per week (sugary coffee, sugary tea, soft drinks, etc.). |
| Age group            | -                                                                                                                          |
| Gender               | -                                                                                                                          |
| BMI                  | -                                                                                                                          |
| Special groups       | Endocrine disorders (e.g., diabetes).                                                                                      |
| Injuries             | -                                                                                                                          |
| Daily time available | Any.                                                                                                                       |
| Development location | Any.                                                                                                                       |
| Required materials   | No specific equipment needed.                                                                                              |
| PF                   | 4.5                                                                                                                        |
| BP                   | 4.5                                                                                                                        |

|     |     |
|-----|-----|
| GH  | 7   |
| V   | 6   |
| SF  | 2.5 |
| MH  | 5.5 |
| FC  | 2   |
| LVC | 2   |
| GVC | 2   |
| ASC | 8   |
| WGC | 3   |
| DC  | 2   |
| SSS | 6.5 |
| IS  | 6.5 |
| HS  | 2.5 |
| ER  | 7   |

Challenge 21:

| Item                 | Description                                                                                         |
|----------------------|-----------------------------------------------------------------------------------------------------|
| Challenge name       | Eating whole grains <sup>1,3</sup> .                                                                |
| Activity description | This consists of consuming four servings of whole grains per day, while avoiding processed cereals. |
| Age group            | -                                                                                                   |
| Gender               | -                                                                                                   |
| BMI                  | -                                                                                                   |
| Special groups       | Endocrine disorders (e.g., gluten intolerance).                                                     |
| Injuries             | -                                                                                                   |
| Daily time available | Any.                                                                                                |
| Development location | Any.                                                                                                |
| Required materials   | No specific equipment needed.                                                                       |
| PF                   | 4.5                                                                                                 |
| BP                   | 4.5                                                                                                 |
| GH                   | 5.5                                                                                                 |
| V                    | 6                                                                                                   |
| SF                   | 3                                                                                                   |
| MH                   | 5.5                                                                                                 |

|     |     |
|-----|-----|
| FC  | 1.5 |
| LVC | 1.5 |
| GVC | 1.5 |
| ASC | 4   |
| WGC | 9.5 |
| DC  | 4   |
| SSS | 3.5 |
| IS  | 3   |
| HS  | 2.5 |
| ER  | 6   |

Challenge 22:

| Item                 | Description                                                                                                        |
|----------------------|--------------------------------------------------------------------------------------------------------------------|
| Challenge name       | Cardio-healthy routes <sup>1,2</sup> .                                                                             |
| Activity description | This consists of doing three cardio-healthy routes per week accompanied by friends or colleagues from work/school. |
| Age group            | -                                                                                                                  |
| Gender               | -                                                                                                                  |
| BMI                  | -                                                                                                                  |
| Special groups       | -                                                                                                                  |
| Injuries             | Lower body.                                                                                                        |
| Daily time available | Any.                                                                                                               |
| Development location | Any.                                                                                                               |
| Required materials   | No specific equipment needed.                                                                                      |
| PF                   | 7                                                                                                                  |
| BP                   | 6.5                                                                                                                |
| GH                   | 8                                                                                                                  |
| V                    | 8                                                                                                                  |
| SF                   | 9                                                                                                                  |
| MH                   | 9                                                                                                                  |
| FC                   | 2.5                                                                                                                |
| LVC                  | 1.5                                                                                                                |
| GVC                  | 1.5                                                                                                                |

|     |     |
|-----|-----|
| ASC | 2.5 |
| WGC | 2   |
| DC  | 2   |
| SSS | 8   |
| IS  | 6.5 |
| HS  | 4.5 |
| ER  | 7   |

Challenge 23:

| Item                 | Description                                                                        |
|----------------------|------------------------------------------------------------------------------------|
| Challenge name       | Meditate to feel better <sup>1</sup> .                                             |
| Activity description | This consists of doing a 50-minute meditation session per week (Kim et al., 2022). |
| Age group            | -                                                                                  |
| Gender               | -                                                                                  |
| BMI                  | -                                                                                  |
| Special groups       | -                                                                                  |
| Injuries             | -                                                                                  |
| Daily time available | >30'.                                                                              |
| Development location | Any.                                                                               |
| Required materials   | No specific equipment needed.                                                      |
| PF                   | 4.5                                                                                |
| BP                   | 6.5                                                                                |
| GH                   | 6.5                                                                                |
| V                    | 7                                                                                  |
| SF                   | 4.5                                                                                |
| MH                   | 8.5                                                                                |
| FC                   | 1.5                                                                                |
| LVC                  | 1.5                                                                                |
| GVC                  | 1.5                                                                                |
| ASC                  | 1.5                                                                                |
| WGC                  | 1.5                                                                                |
| DC                   | 1.5                                                                                |

|     |     |
|-----|-----|
| SSS | 7.5 |
| IS  | 5.5 |
| HS  | 4   |
| ER  | 6   |

Challenge 24:

| Item                 | Description                                                                              |
|----------------------|------------------------------------------------------------------------------------------|
| Challenge name       | Have an early dinner <sup>1,4</sup> .                                                    |
| Activity description | This consists of having dinner at least 2 hours before going to bed throughout the week. |
| Age group            | -                                                                                        |
| Gender               | -                                                                                        |
| BMI                  | -                                                                                        |
| Special groups       | -                                                                                        |
| Injuries             | -                                                                                        |
| Daily time available | Any.                                                                                     |
| Development location | Any.                                                                                     |
| Required materials   | No specific equipment needed.                                                            |
| PF                   | 4                                                                                        |
| BP                   | 4                                                                                        |
| GH                   | 7                                                                                        |
| V                    | 5.5                                                                                      |
| SF                   | 3                                                                                        |
| MH                   | 6.5                                                                                      |
| FC                   | 2.5                                                                                      |
| LVC                  | 1.5                                                                                      |
| GVC                  | 1.5                                                                                      |
| ASC                  | 2                                                                                        |
| WGC                  | 2                                                                                        |
| DC                   | 2                                                                                        |
| SSS                  | 8                                                                                        |
| IS                   | 6.5                                                                                      |
| HS                   | 7                                                                                        |

|    |   |
|----|---|
| ER | 4 |
|----|---|

Challenge 25:

| Item                 | Description                                                                                                       |
|----------------------|-------------------------------------------------------------------------------------------------------------------|
| Challenge name       | Keep in touch <sup>1</sup> .                                                                                      |
| Activity description | This consists of having a conversation with a friend whom you haven't spoken to in a while, at least once a week. |
| Age group            | -                                                                                                                 |
| Gender               | -                                                                                                                 |
| BMI                  | -                                                                                                                 |
| Special groups       | -                                                                                                                 |
| Injuries             | -                                                                                                                 |
| Daily time available | Any.                                                                                                              |
| Development location | Any.                                                                                                              |
| Required materials   | No specific equipment needed.                                                                                     |
| PF                   | 1                                                                                                                 |
| BP                   | 1                                                                                                                 |
| GH                   | 4                                                                                                                 |
| V                    | 4.5                                                                                                               |
| SF                   | 8                                                                                                                 |
| MH                   | 8                                                                                                                 |
| FC                   | 1                                                                                                                 |
| LVC                  | 1                                                                                                                 |
| GVC                  | 1                                                                                                                 |
| ASC                  | 1                                                                                                                 |
| WGC                  | 1                                                                                                                 |
| DC                   | 1                                                                                                                 |
| SSS                  | 6                                                                                                                 |
| IS                   | 5.5                                                                                                               |
| HS                   | 2.5                                                                                                               |
| ER                   | 1                                                                                                                 |

Challenge 26:

| Item                 | Description                                                                                                |
|----------------------|------------------------------------------------------------------------------------------------------------|
| Challenge name       | Gather with your friends <sup>1</sup> .                                                                    |
| Activity description | This consists of engaging in cultural activities or playing board games with friends at least once a week. |
| Age group            | -                                                                                                          |
| Gender               | -                                                                                                          |
| BMI                  | -                                                                                                          |
| Special groups       | -                                                                                                          |
| Injuries             | -                                                                                                          |
| Daily time available | Any.                                                                                                       |
| Development location | Any.                                                                                                       |
| Required materials   | No specific equipment needed.                                                                              |
| PF                   | 1                                                                                                          |
| BP                   | 1                                                                                                          |
| GH                   | 5.5                                                                                                        |
| V                    | 5.5                                                                                                        |
| SF                   | 7.5                                                                                                        |
| MH                   | 7.5                                                                                                        |
| FC                   | 1                                                                                                          |
| LVC                  | 1                                                                                                          |
| GVC                  | 1                                                                                                          |
| ASC                  | 1                                                                                                          |
| WGC                  | 1                                                                                                          |
| DC                   | 1                                                                                                          |
| SSS                  | 6.5                                                                                                        |
| IS                   | 5                                                                                                          |
| HS                   | 4.5                                                                                                        |
| ER                   | 3                                                                                                          |



Challenge 27:

| Item                 | Description                                                                                                         |
|----------------------|---------------------------------------------------------------------------------------------------------------------|
| Challenge name       | Improve your orientation <sup>1</sup> .                                                                             |
| Activity description | This consists of exploring different routes in your city (without using GPS) and varying them at least once a week. |
| Age group            | 5-17 years.                                                                                                         |
| Gender               | -                                                                                                                   |
| BMI                  | -                                                                                                                   |
| Special groups       | Mental, behavioral and neurodevelopmental disorders (e.g., disorientation).                                         |
| Injuries             | Lower body.                                                                                                         |
| Daily time available | Any.                                                                                                                |
| Development location | Any.                                                                                                                |
| Required materials   | No specific equipment needed.                                                                                       |
| PF                   | 6.5                                                                                                                 |
| BP                   | 6                                                                                                                   |
| GH                   | 7.5                                                                                                                 |
| V                    | 7                                                                                                                   |
| SF                   | 6                                                                                                                   |
| MH                   | 7.5                                                                                                                 |
| FC                   | 1.5                                                                                                                 |
| LVC                  | 1                                                                                                                   |
| GVC                  | 1                                                                                                                   |
| ASC                  | 1.5                                                                                                                 |
| WGC                  | 1.5                                                                                                                 |
| DC                   | 1.5                                                                                                                 |
| SSS                  | 7                                                                                                                   |
| IS                   | 5                                                                                                                   |
| HS                   | 3                                                                                                                   |
| ER                   | 4                                                                                                                   |

Challenge 28:

| Item                 | Description                                                   |
|----------------------|---------------------------------------------------------------|
| Challenge name       | Paper reading <sup>1,4.</sup>                                 |
| Activity description | This consists of reading two books in paper format per month. |
| Age group            | -                                                             |
| Gender               | -                                                             |
| BMI                  | -                                                             |
| Special groups       | -                                                             |
| Injuries             | -                                                             |
| Daily time available | Any.                                                          |
| Development location | Any.                                                          |
| Required materials   | No specific equipment needed.                                 |
| PF                   | 1                                                             |
| BP                   | 1                                                             |
| GH                   | 3.5                                                           |
| V                    | 4                                                             |
| SF                   | 4                                                             |
| MH                   | 7                                                             |
| FC                   | 0                                                             |
| LVC                  | 0                                                             |
| GVC                  | 0                                                             |
| ASC                  | 0                                                             |
| WGC                  | 0                                                             |
| DC                   | 0                                                             |
| SSS                  | 7                                                             |
| IS                   | 7                                                             |
| HS                   | 2.5                                                           |
| ER                   | 7                                                             |

Challenge 29:

| Item           | Description                        |
|----------------|------------------------------------|
| Challenge name | Train your balance <sup>1,2.</sup> |

|                      |                                                                               |
|----------------------|-------------------------------------------------------------------------------|
| Activity description | This consists of performing 15 minutes of balance training three days a week. |
| Age group            | -                                                                             |
| Gender               | -                                                                             |
| BMI                  | -                                                                             |
| Special groups       | -                                                                             |
| Injuries             | Lower body. Trunk.                                                            |
| Daily time available | Any.                                                                          |
| Development location | Any.                                                                          |
| Required materials   | No specific equipment needed.                                                 |
| PF                   | 7                                                                             |
| BP                   | 7.5                                                                           |
| GH                   | 7.5                                                                           |
| V                    | 6                                                                             |
| SF                   | 4.5                                                                           |
| MH                   | 7                                                                             |
| FC                   | 1.5                                                                           |
| LVC                  | 1                                                                             |
| GVC                  | 1                                                                             |
| ASC                  | 1.5                                                                           |
| WGC                  | 1.5                                                                           |
| DC                   | 1.5                                                                           |
| SSS                  | 7                                                                             |
| IS                   | 5.5                                                                           |
| HS                   | 3.5                                                                           |
| ER                   | 5                                                                             |

Challenge 30:

|                      |                                                                |
|----------------------|----------------------------------------------------------------|
| Item                 | Description                                                    |
| Challenge name       | Unleash the artist within you <sup>1</sup> .                   |
| Activity description | This consists of painting or drawing at least two days a week. |
| Age group            | -                                                              |
| Gender               | -                                                              |

|                      |                               |
|----------------------|-------------------------------|
| BMI                  | -                             |
| Special groups       | -                             |
| Injuries             | Upper body.                   |
| Daily time available | Any.                          |
| Development location | Any.                          |
| Required materials   | No specific equipment needed. |
| PF                   | 1                             |
| BP                   | 0.5                           |
| GH                   | 4.5                           |
| V                    | 3                             |
| SF                   | 3.5                           |
| MH                   | 6.5                           |
| FC                   | 0                             |
| LVC                  | 0                             |
| GVC                  | 0                             |
| ASC                  | 0                             |
| WGC                  | 0                             |
| DC                   | 0                             |
| SSS                  | 6.5                           |
| IS                   | 4.5                           |
| HS                   | 2.5                           |
| ER                   | 3                             |

## References:

14. Bull, F.C.; Al-Ansari, S.S.; Biddle, S.; Borodulin, K.; Buman, M.P.; Cardon, G.; Carty, C.; Chaput, J.-P.; Chastin, S.; Chou, R. World Health Organization 2020 Guidelines on Physical Activity and Sedentary Behaviour. *British journal of sports medicine* **2020**, *54*, 1451–1462. <https://doi.org/10.1136/bjsports-2020-102955>.
18. World Health Organization *Food-Based Dietary Guidelines in the WHO European Region*; Copenhagen: WHO Regional Office for Europe; Copenhagen, Denmark, 2003.
23. World Health Organization *Diet, Nutrition, and the Prevention of Chronic Diseases: Report of a Joint WHO/FAO Expert Consultation*; World Health Organization; Geneva, Switzerland, 2003; Vol. 916; ISBN 92-4-120916-X. <https://doi.org/10.1007/bf03083830>.
13. World Health Organization A Healthy Lifestyle—WHO Recommendations. **2010**.
22. World Health Organization *Guideline: Sugars Intake for Adults and Children*; World Health Organization: Geneva, Switzerland 2015; ISBN 92-4-154902-5.
16. World Health Organization. *WHO Guidelines on Physical Activity and Sedentary Behaviour: Web Annex: Evidence Profiles*; World Health Organization: Geneva, Switzerland, 2020.
19. World Health Organization. *World Health Statistics 2022: Monitoring Health for the SDGs, Sustainable Development Goals*; World Health Organization: Geneva, Switzerland, 2022.
15. Piercy, K.L.; Troiano, R.P.; Ballard, R.M.; Carlson, S.A.; Fulton, J.E.; Galuska, D.A.; George, S.M.; Olson, R.D. The Physical Activity Guidelines for Americans. *JAMA* **2018**, *320*, 2020–2028. <https://doi.org/10.1001/jama.2018.14854>.
20. F FAO Frutas y Verduras—Esenciales en tu Dieta: Año Internacional de las Frutas y Verduras, 2021. Documento de Antecedentes; FAO: Rome, Italy, 2020; ISBN 978-92-5-133713-4. <https://doi.org/10.4060/cb6234es>.

24. Hirshkowitz, M.; Whiton, K.; Albert, S.M.; Alessi, C.; Bruni, O.; DonCarlos, L.; Hazen, N.; Herman, J.; Katz, E.S.; Kheirandish-Gozal, L. National Sleep Foundation's Sleep Time Duration Recommendations: Methodology and Results Summary. *Sleep Health* **2015**, *1*, 40–43. <https://doi.org/10.1016/j.sleh.2014.12.010>.
25. Merino-Andreu, M.; Alvarez-Ruiz de Larrinaga, A.; Madrid-Perez, J.A.; Martinez-Martinez, M.A.; Puertas-Cuesta, F.J.; Asencio-Guerra, A.J.; Santo-Tomas, O.R.; Jurado-Luque, M.J.; Segarra-Isern, F.J.; Canet-Sanz, T.; et al. [Healthy Sleep: Evidence and Guidelines for Action. Official Document of the Spanish Sleep Society]. *Rev. De Neurol.* **2016**, *63*, 1–27.
52. Nishida, C.; Uauy, R. WHO Scientific Update on Health Consequences of Trans Fatty Acids: Introduction. *Eur. J. Clin. Nutr.* **2009**, *63*, S1–S4. <https://doi.org/10.1038/ejcn.2009.13>.
53. Klika, B.; Jordan, C. High-Intensity Circuit Training Using Body Weight: Maximum Results with Minimal Investment. *ACSM's Health & Fitness Journal* **2013**, *17*, 8–13.
54. Lopez-Barreiro, J.; Hernandez-Lucas, P.; Garcia-Soidan, J.L.; Romo-Perez, V. Effects of an Eccentric Training Protocol Using Gliding Discs on Balance and Lower Body Strength in Healthy Adults. *Journal of Clinical Medicine* **2021**, *10*, 5965. <https://doi.org/10.3390/jcm10245965>.
