# Supplementary material for: Practical Approach to Designing and Implementing a Recommendation System for Healthy Challenges
Source: MDPI journal article supplement (doi:10.3390/app13179782), 2023-08-29
Supplement: s1 [file s1]

Archive with 1 entries (1 files):
- applsci-2519325-supplementary.pdf
